# Supplementary material for: Synthesis of stretchable hybrid copper films via nanoconfinement
Source: Royal Society of Chemistry journal article supplement (doi:10.1039/d3ta04958b), 2023-11-22
Supplement: d3ta04958b1.pdf [file d3ta04958b1.pdf]

## Supporting information

# Synthesis of Stretchable Hybrid Copper Films via Nanoconfinement

Xin Ma<sup>1</sup>, Donghao Xie<sup>1</sup>, Jiayi Wang<sup>1</sup>, Zekun Wang<sup>1</sup>, Qiao Gu<sup>2</sup>, Yonghong Deng<sup>3</sup> and  
Ping Gao<sup>\*1,2</sup>

\*Corresponding author

*<sup>a</sup>Advanced Materials Thrust, Function Hub, Department of Chemical and Biological Engineering, The Hong Kong University of Science and Technology, Clear Water Bay, Hong Kong, China*

*<sup>b</sup>Department of Materials Science and Engineering, Southern University of Science and Technology, Shenzhen 518055, China*

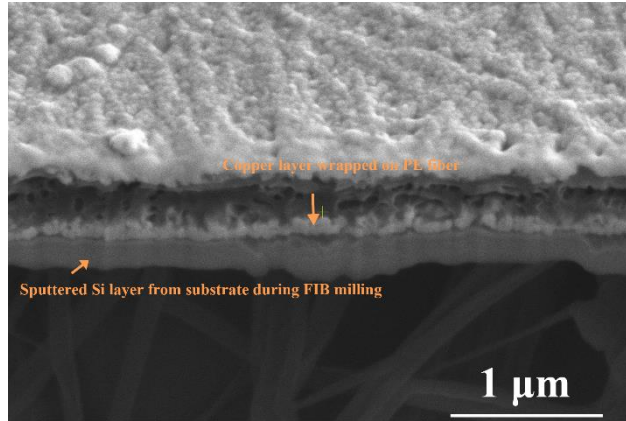

**Fig. S1** Surface and cross section image of CuPE (150 nm Cu/350 nm PE/150 nm Cu)

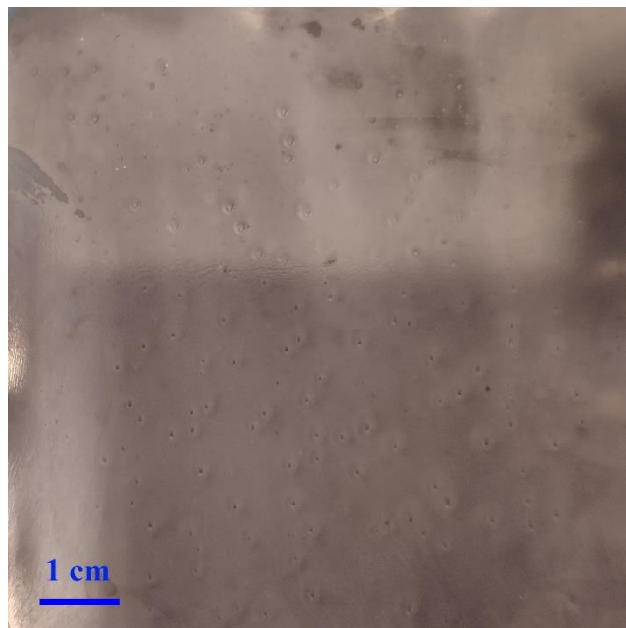

**Fig. S2** 21% Stretched CuPE film.

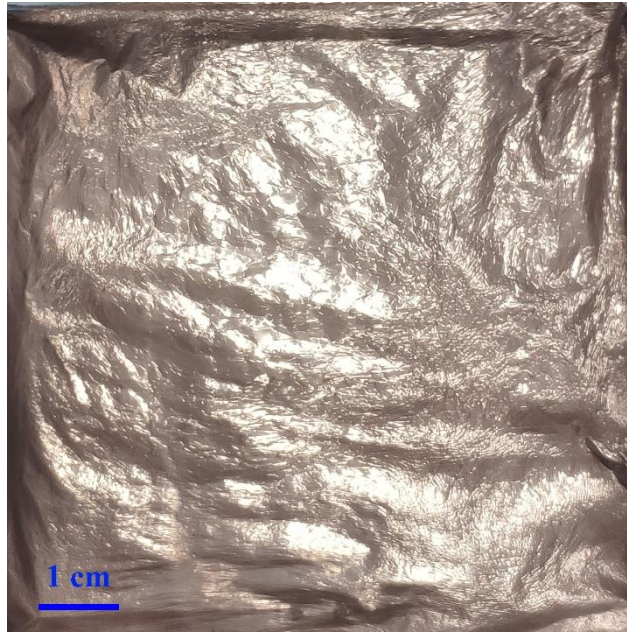

**Fig. S3** Wrinkled CuPE when back to initial position after stretching.

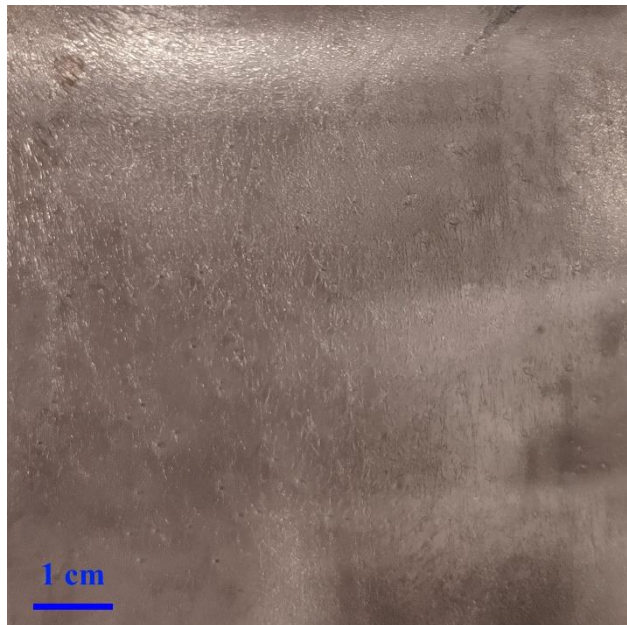

**Fig. S4** Annealed CuPE from Figure S3

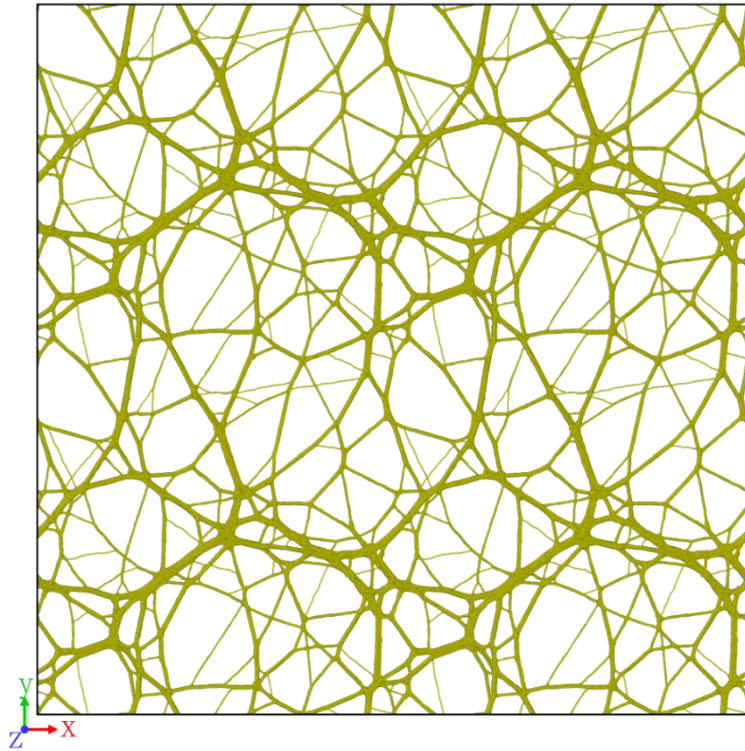

**Fig. S5** Fiber distribution of stretched PE

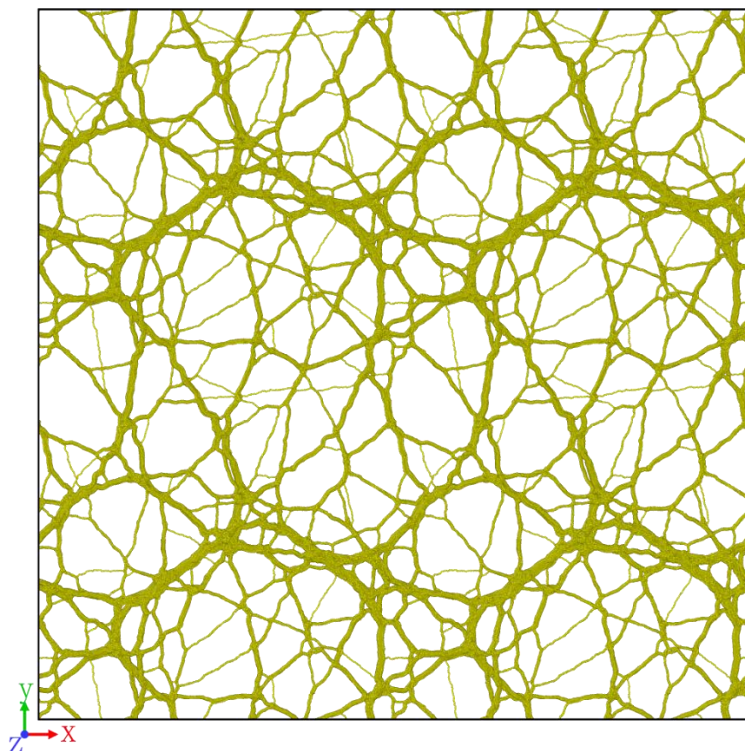

**Fig. S6** Gauche conformations of PE fiber during retraction

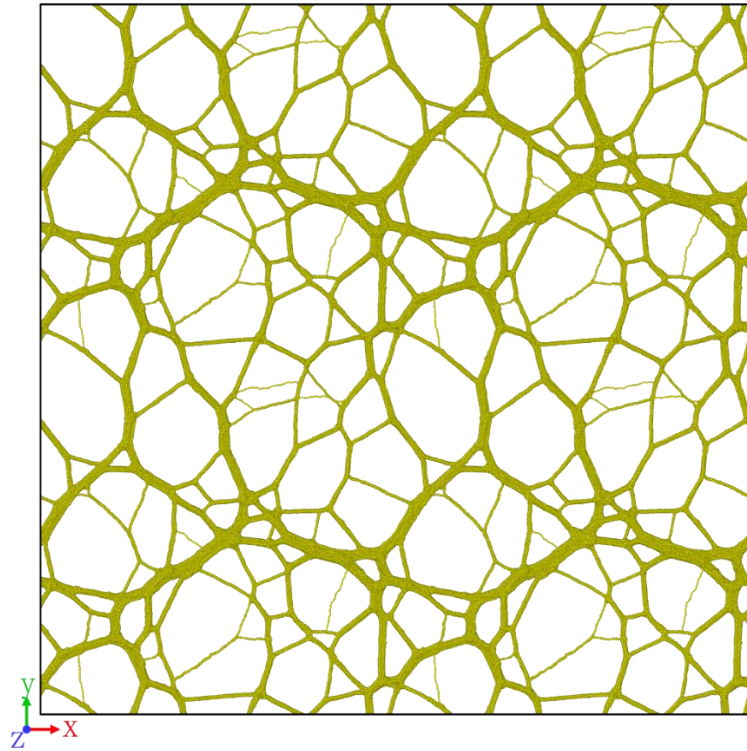

Fig. S7 Restoration of PE fiber

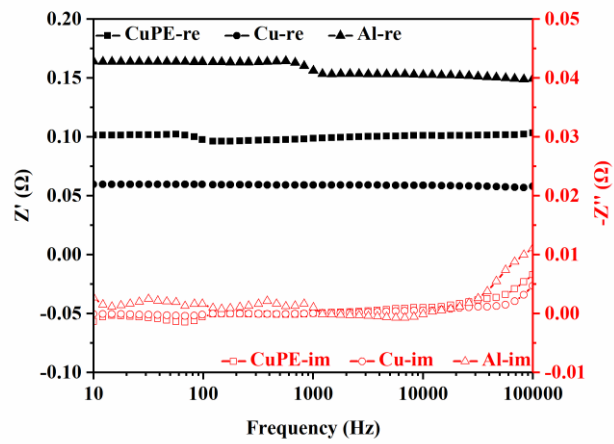

Fig. S8  $Z'$ -re and  $Z'$ -im of commercial Cu, Al along with CuPE after subtract background.

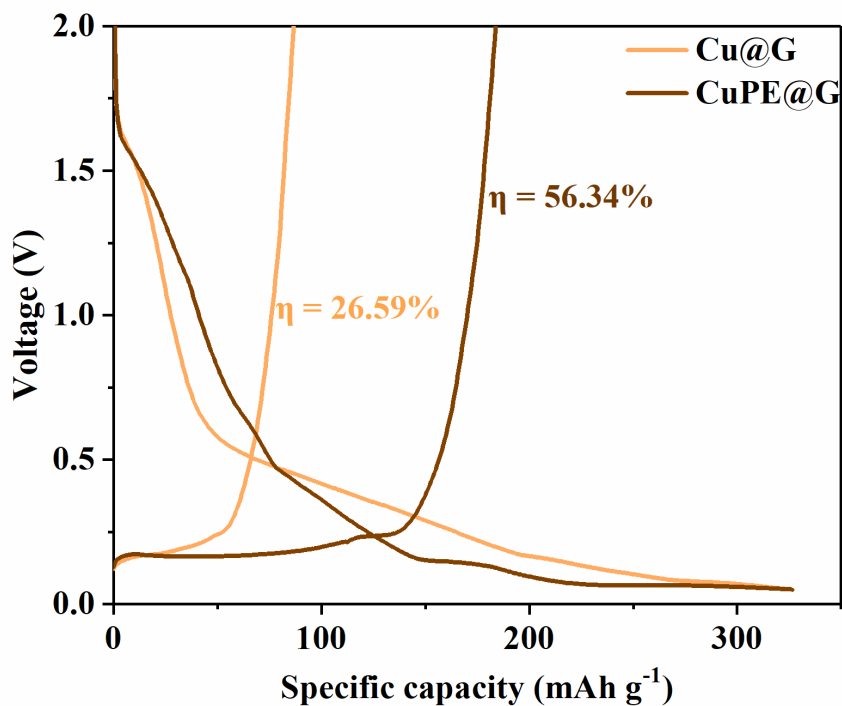

Fig. S9 Initial cycle charge and discharge curve of graphite/Cu and graphite/CuPE electrodes after mechanical distortions by folding, twisting and unfolding.

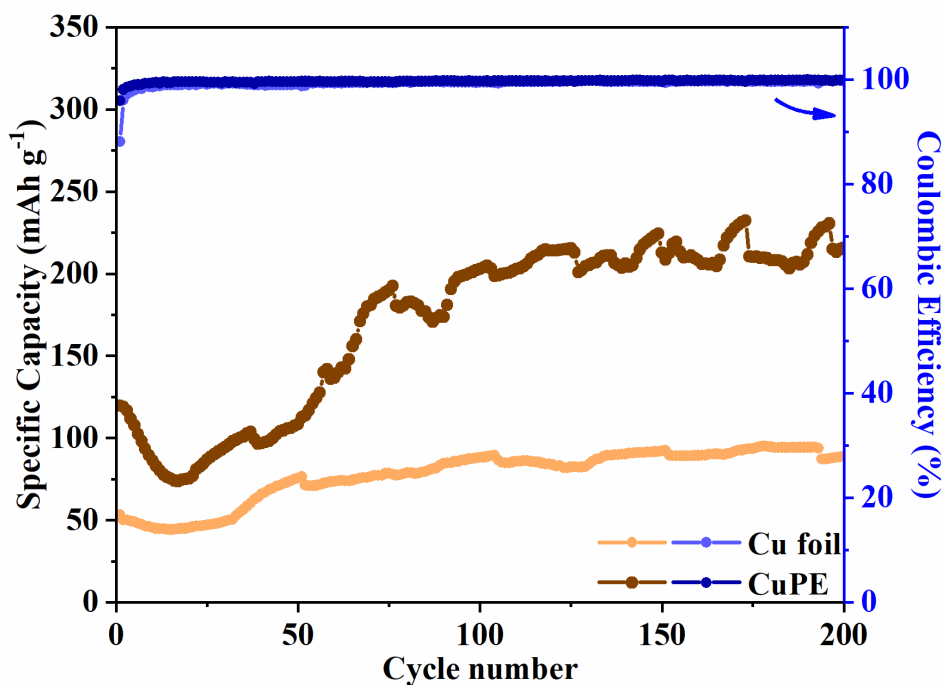

Fig. S10 Discharge capacity during long cycles of graphite/Cu and graphite/CuPE electrodes after mechanical distortions by folding, twisting and unfolding.

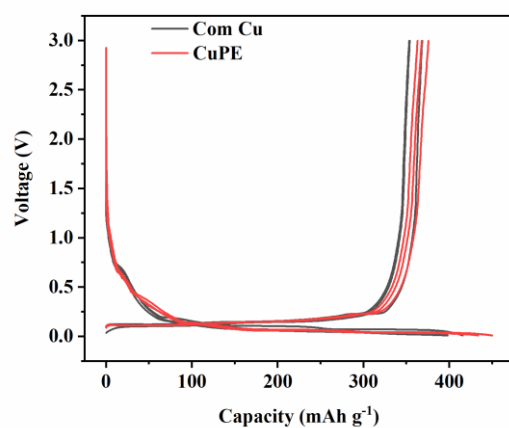

**Fig. S11** Charge and discharge curve of graphite/Cu and graphite/CuPE electrodes

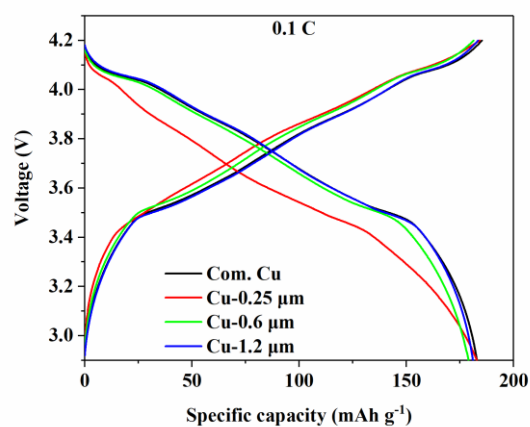

**Fig. S12** Charge and discharge curves of rate test at 0.1 C corresponding to Figure 5b.

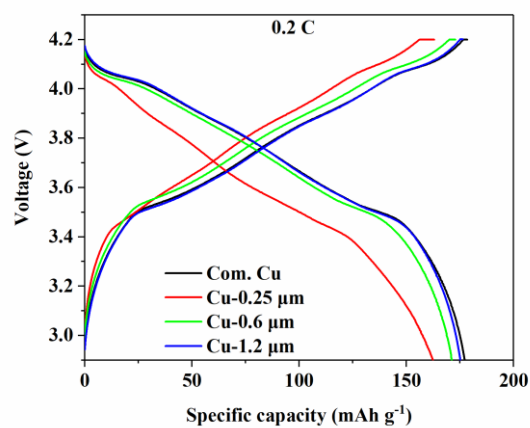

**Fig. S13** Charge and discharge curves of rate test at 0.2 C corresponding to Figure 5b.

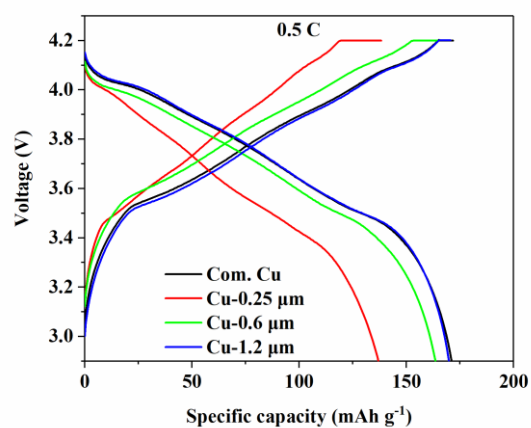

**Fig. S14** Charge and discharge curves of rate test at 0.5 C corresponding to Figure 5b.

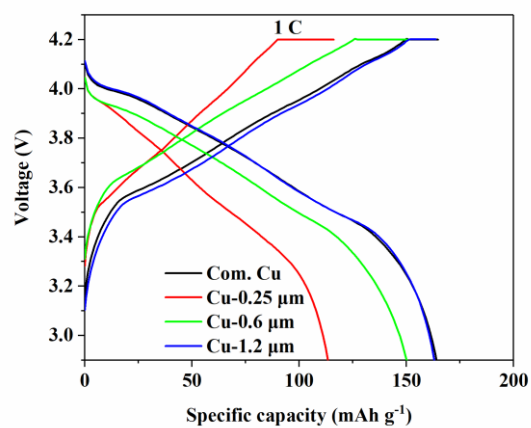

**Fig. S15** Charge and discharge curves of rate test at 1 C corresponding to Figure 5b.

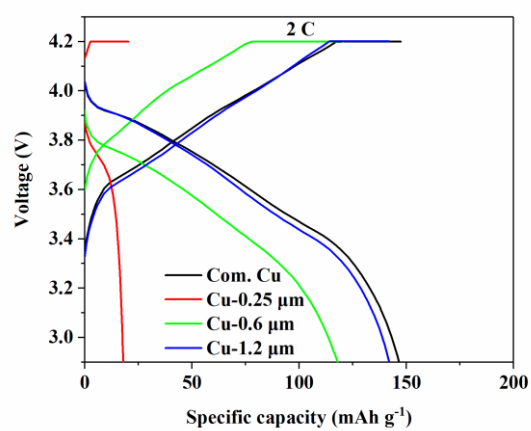

**Fig. S16** Charge and discharge curves of rate test at 2 C corresponding to Figure 5b.



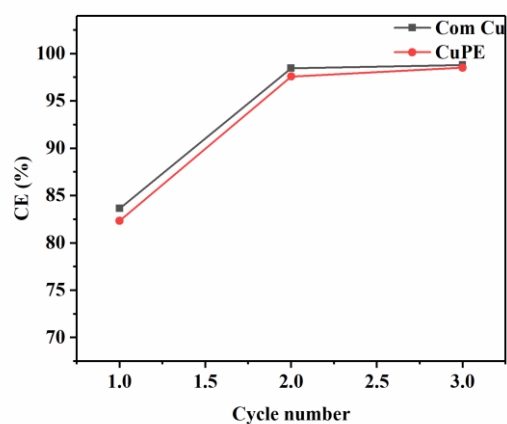

**Fig. S17** Coulombic efficiency in initial 3-formation cycles of NMC 811//graphite pouch bags with commercial copper foil and CuPE (0.6  $\mu\text{m}$  Cu at each side)

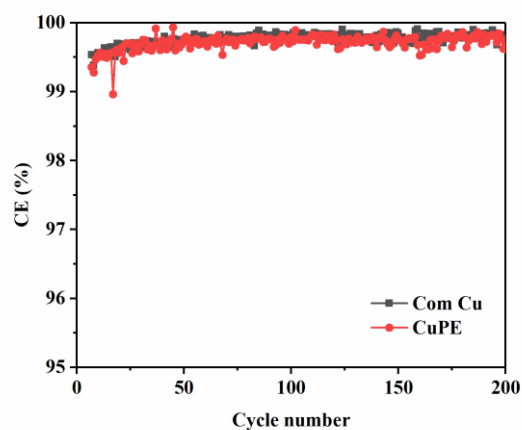

**Fig. S18** Coulombic efficiency in 0.5 C long-cycle test of NMC 811//graphite pouch bags with commercial copper foil and CuPE (0.6  $\mu\text{m}$  Cu at each side)

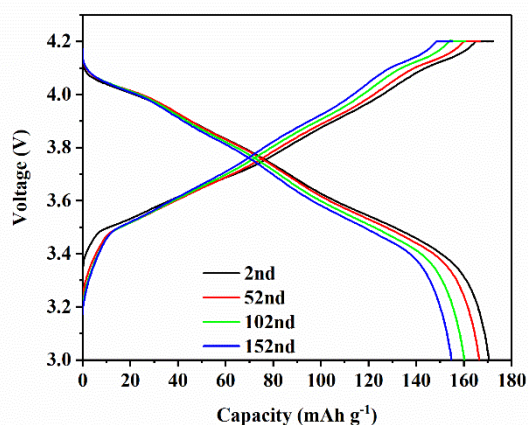

**Fig. S19** Typical charge and discharge curve of NMC 811//graphite pouch bags with commercial copper foil during long cycles at 0.5 C.

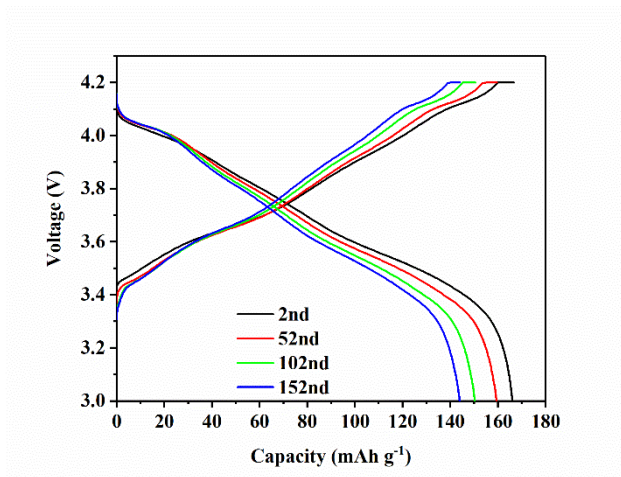

**Fig. S20** Typical charge and discharge curve of NMC 811//graphite pouch bags with CuPE (0.6  $\mu\text{m}$  Cu at each side) during long cycles at 0.5 C.

**Table S1.** Calculation of energy density of various cathodes in pouch bags. Here the commercial Cu foil is 9  $\mu\text{m}$  and the CuPE is 0.6  $\mu\text{m}$  Cu at each side.

| Cathode materials                                                         | LCO    | NMC 111 | NMC 532 | NMC 811 | LFP    | LLRO   |
|---------------------------------------------------------------------------|--------|---------|---------|---------|--------|--------|
| Cathode area density at each side (mAh cm <sup>-2</sup> )                 | 2      |         |         |         |        |        |
| Cathode mass capacity (mAh g <sup>-1</sup> )                              | 160    | 180     | 200     | 220     | 160    | 250    |
| Average discharge voltage (mAh g <sup>-1</sup> )                          | 3.9    | 3.7     | 3.8     | 3.9     | 3.4    | 4      |
| Cathode material area mass (mg cm <sup>-2</sup> )                         | 25.00  | 22.22   | 20.00   | 18.18   | 25.00  | 16.00  |
| Active material ratio                                                     | 96%    |         |         |         |        |        |
| Cathode material area mass with binder and super P (mg cm <sup>-2</sup> ) | 26.04  | 23.15   | 20.83   | 18.94   | 26.04  | 16.67  |
| Area mass of Al foil (mg cm <sup>-2</sup> )                               | 3.6    |         |         |         |        |        |
| Cathode total area mass (mg cm <sup>-2</sup> )                            | 29.64  | 26.75   | 24.43   | 22.54   | 29.64  | 20.27  |
| Negative/positive ratio                                                   | 1.05   |         |         |         |        |        |
| Anode area density (mAh cm <sup>-2</sup> )                                | 4.2    |         |         |         |        |        |
| Anode mass capacity (mAh g <sup>-1</sup> )                                | 320    |         |         |         |        |        |
| Active material ratio                                                     | 95%    |         |         |         |        |        |
| Anode material area mass with binder and super P (mg cm <sup>-2</sup> )   | 13.8   |         |         |         |        |        |
| Area mass of commercial Cu foil(mg cm <sup>-2</sup> )                     | 8.06   |         |         |         |        |        |
| Total area mass with commercial Cu (mg cm <sup>-2</sup> )                 | 21.88  |         |         |         |        |        |
| Separator and electrolyte (mg/cm <sup>-2</sup> )                          | 0.5+6  |         |         |         |        |        |
| Real capacity (mAh g <sup>-1</sup> )                                      | 66.10  | 69.42   | 72.32   | 74.89   | 66.10  | 78.21  |
| Energy density (Wh kg <sup>-1</sup> )                                     | 257.78 | 256.84  | 274.82  | 292.05  | 224.73 | 312.85 |
| Area mass of CuPE (mg cm <sup>-2</sup> )                                  | 1.2    |         |         |         |        |        |
| Total area mass with CuPE (mg cm <sup>-2</sup> )                          | 15.02  |         |         |         |        |        |
| Real capacity (mAh g <sup>-1</sup> )                                      | 74.55  | 78.80   | 82.56   | 85.92   | 74.55  | 90.33  |
| Energy density (Wh kg <sup>-1</sup> )                                     | 290.73 | 291.55  | 313.73  | 335.09  | 253.46 | 361.32 |
| Improvement (%)                                                           | 12.78  | 13.51   | 14.16   | 14.74   | 12.78  | 15.49  |
